# Supplementary material for: Facile synthesis of a highly water-soluble graphene conjugated chlorophyll-a photosensitizer composite for improved photodynamic therapy in vitro
Source: Royal Society of Chemistry journal article supplement (doi:10.1039/c7nj01696d), 2017-01-01
Supplement: c7nj01696d1.pdf [file c7nj01696d1.pdf]

## Supporting Information for

### *New Journal of Chemistry*

#### Facile synthesis of highly water-soluble graphene conjugated chlorophyll-a photosensitizer composite for improved photodynamic therapy in vitro

Hongyue Zhang,<sup>a</sup> Jianjun Cheng,<sup>a</sup> Wenting Li,<sup>a</sup> Guanghui Tan,<sup>\*a,b</sup> Zhiqiang Wang<sup>\*a</sup> and Yingxue Jin<sup>\*a</sup>

*a. Key Laboratory of Photochemistry biomaterials and Energy storage materials of Heilongjiang Province, College of Chemistry & Chemical Engineering Harbin Normal University, Harbin, 150025, China. E-mail: jyxprof@163.com, wzq70402@163.com; Tel: +86-0451-88060569*

*b. Key Laboratory of Molecular Cytogenetics and Genetic Breeding of Heilongjiang Province, Harbin, 150025, China. E-mail: yenghak@hrbnu.edu.cn*

#### Results and discussion

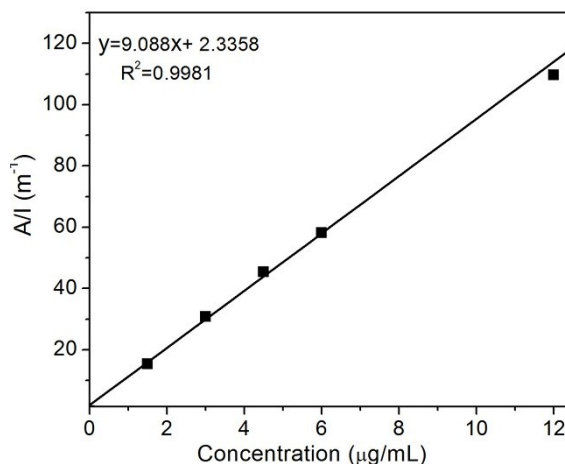

**Fig. S1** Absorbance of free BPMppa at Qy band per cell length as a function of various concentrations, and corresponding molar extinction coefficient was normalized by linear regression.

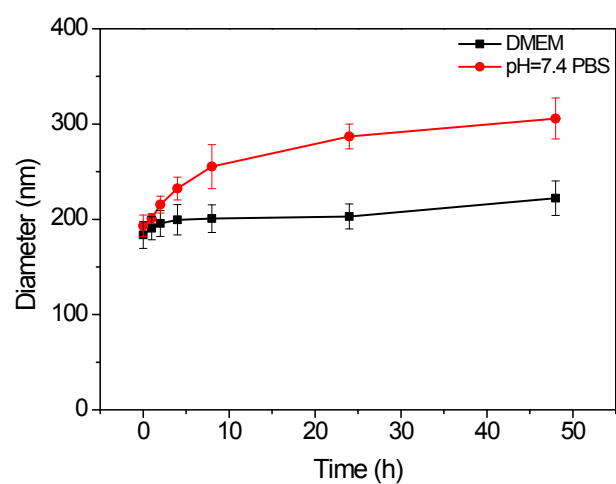

**Fig. S2** The mean diameter changes of G-BPMppa in PBS (pH 7.4), and DMEM (containing 10% FBS) over the time. Each experiment was paralleled three times.
